# Supplementary material for: Heterochiasmy and the establishment of gsdf as a novel sex determining gene in Atlantic halibut
Source: PLOS journal article supplement (doi:10.1371/journal.pgen.1010011), 2022-02-08

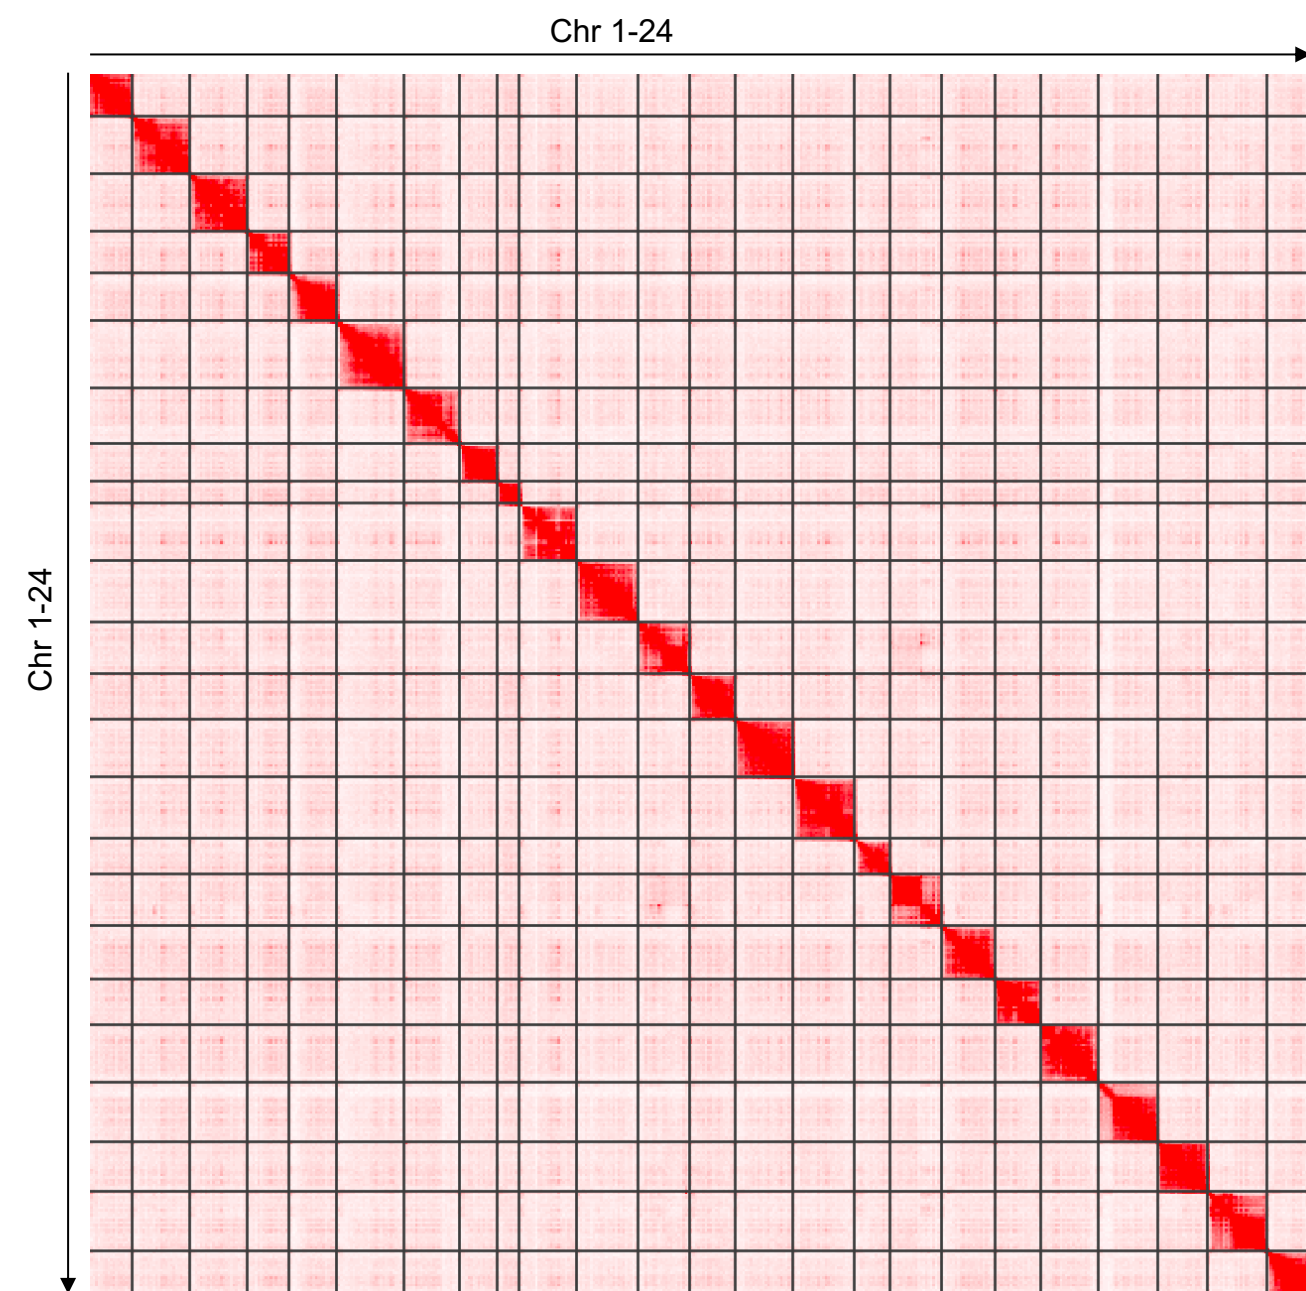

**Supplementary Fig. 2:** HiC contact matrix after scaffolding the Oxford Nanopore contig assembly using HiRise. Scaffolding resulted in 24 major scaffolds, in agreement with the karyotype of Atlantic halibut. Chromosomes are sorted numerically 1-24 and are separated by white lines.

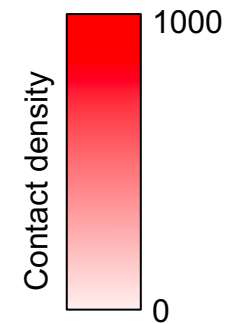

Supplement: S2 (10.1371/journal.pgen.1010011.s002) [file journal.pgen.1010011.s002]
